# Supplementary material
Source: PubMed Central journal article supplement (PMC5411512)
Supplement: AEM.00233-17_zam999117816s1.pdf [file AEM.00233-17_zam999117816s1.pdf]

1 **Supplemental materials**

2 **Genome editing in *Clostridium saccharoperbutylacetonicum* N1-4 using CRISPR-Cas9**  
3 **system**

4 Shaohua Wang<sup>a</sup>, Sheng Dong<sup>a</sup>, Pixiang Wang<sup>a</sup>, Yong Tao<sup>a,b</sup>, Yi Wang<sup>a,c\*</sup>

5 <sup>a</sup>Department of Biosystems Engineering, Auburn University, Auburn, AL 36849, USA

6 <sup>b</sup>Chengdu Institute of Biology, Chinese Academy of Sciences, Chengdu, 610041, China

7 <sup>c</sup>Center for Bioenergy and Bioproducts, Auburn University, Auburn, AL 36849, USA

8

9

10

11 \*Corresponding author:

12 Yi Wang,

13 Department of Biosystems Engineering,

14 Auburn University,

15 215 Tom E. Corley Building,

16 Auburn, AL, 36849 USA

17 Tel: 1-334-844-3503

18 Fax: 1-334-844-3530

19 E-mail: [yiwang3@auburn.edu](mailto:yiwang3@auburn.edu)

20

21

22 **TABLE S1** Primers used in this study

| Primers | Sequence (5'-3')                                                                    |
|---------|-------------------------------------------------------------------------------------|
| YW484   | AAAGTTAAAAGAAGAAAATAGAAATATAATCTTTAATTTGAAAAGATTTAAG                                |
| YW1041  | TTGCTATTTCTAGCTCTAAAACGTTGTATGAACTGCTCCAGAATGGTGGAATGATAAGGG                        |
| YW1035  | TTGCTATTTCTAGCTCTAAAACGAACTTATGCATATAGCTCGATGGTGGAATGATAAGGG                        |
| YW1036  | GAACTTATCCTTAATAGTGTCTTTGTCTCCTCTC                                                  |
| YW1037  | GAGAGGAGACAAAGACACTATTAAGGATAAGTTCAT                                                |
| YW1038  | GGAGCATGTTCAACCAATTCC                                                               |
| YW1039  | TCTTTGTGATATGACTAATAATTAGCGGCCGCCGATAGCGCATTGCTCTGCTT                               |
| YW1040  | TCCACTAGTAACCATCACACTGGCGGCCGCGGAGCATGTTCAACCAATTCC                                 |
| YW1053  | TTGCTATTTCTAGCTCTAAAACCTACTGGCTTAAGCATTCCATGGTGGAATGATAAGGG                         |
| YW949   | TGATATGACTAATAATTAGCGGCCGCAACAAAGAAAGTGGCAGTG                                       |
| YW950   | TTACTTTAATATTATGTAAATCCCCCTCAATTTA                                                  |
| YW951   | CAATTAATTTGAGGGGGATTTACATAATATTAAGTAAAGGCATTTTGA                                    |
| YW952   | ACTAGTAACCATCACACTGGCGGCCGCGCCTATGAATCAAATAAATTTG                                   |
| YW880   | AGACGCATGGCTTTCAAAA                                                                 |
| YW881   | CCGTTTACGAAATTGGAACAG                                                               |
| YW1044  | TAGTGCTGTTTAGGGTTATTAAGGC                                                           |
| YW1045  | AGTTAATGCTCTTGATCTAATTTCC                                                           |
| YW953   | ACGATTTATTAGCAAGATTAAAGGAA                                                          |
| YW954   | AGAAAGCCTATCCATCAACT                                                                |
| YW200   | CGGCATCAGAGCAGATTGTA                                                                |
| YW847   | TTAAGATTTAAAAGGTTACTATGATAATTCTC                                                    |
| YW1042  | AGTTAAAAGAAGAAAATAGAAATAGAAATGGTATAAAGAAGTTATATCTACTAATGGAGC                        |
| YW1043  | TTGCTATTTCTAGCTCTAAAACGTTGTATGAACTGCTCCAGAGTAAACACCCTCTTTAC                         |
| YW1340  | ATTTGACAAAAATGGGCTCGTGTGTACAATAAATGTTCTGGAGCAGTTCATACAACGTTT<br>TAGAGCTAGAAATAGCAAG |
| YW1341  | AAAGTTAAAAGAAGAAAATAGAAATTTATTAACGTTGATATAATTTAAATTTTATTTGACA<br>AAAATGGGCTCGTGTGT  |
| YW1342  | GGATCCACTAGTAACCATCACACTGGCGGCCGCTAATTATTAGTCATATCACAAAGAAT                         |
| YW1338  | GCTCAGTCTTAGGTATAATGCTAGCTCTGGAGCAGTTCATACAACGTTTTAGAGCTAGAAA<br>TAGCAAG            |
| YW1339  | AAAGTTAAAAGAAGAAAATAGAAATTTGACAGCTAGCTCAGTCCTAGGTATAATGCTAGC                        |

23

24

25

26

27

28

29

30

31

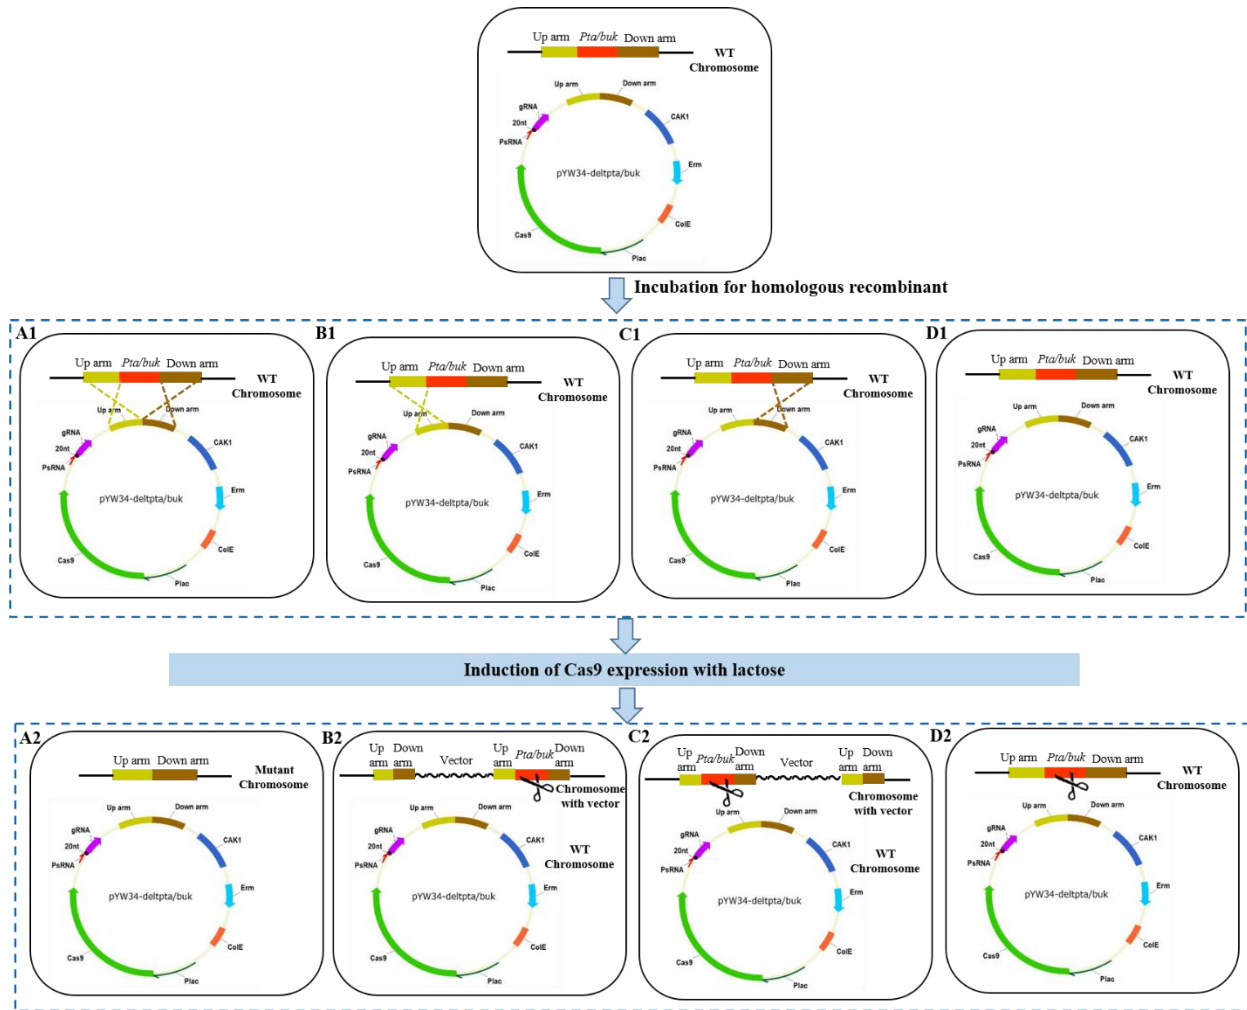

32

33 **Figure S1.** The gene deletion and mutant screening strategy in this study.

34

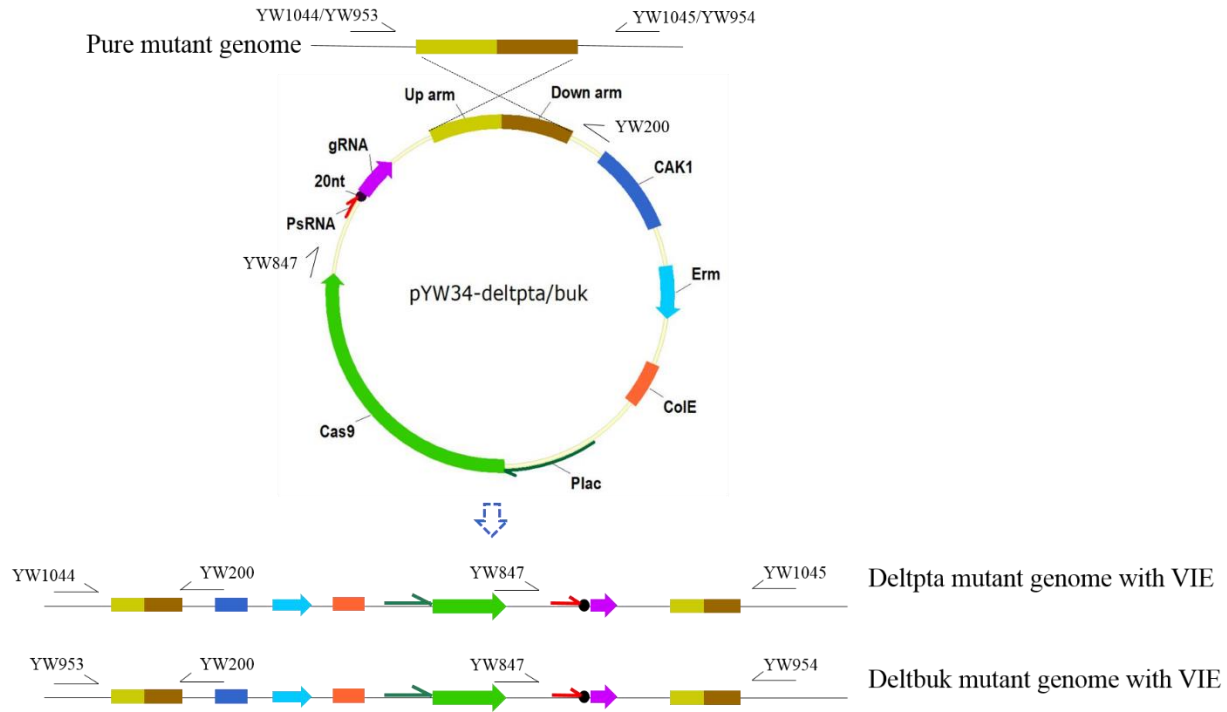

35  
 36 **Figure S2.** Primers were designed to detect the vector integration event (VIE) during genome  
 37 editing. As reported previously (1), vector integration occurs due to the additional crossover  
 38 event between the existing plasmids (YW34-deltpta or pYW34-deltbuk) with the obtained ‘pure’  
 39 mutant, resulting in the mutant containing two copies of the homology arms with the other  
 40 elements from the vector integrated in the middle (as shown in the figure above). To detect VIE,  
 41 a pair of primer with one anneals to the plasmid (YW200 for the upstream VIE and YW847 for  
 42 the downstream VIE) and the other anneals to the chromosome (YW1044/YW1045 for deltpa,  
 43 YW953/YW954 for deltbuk) were used. In another words, YW1044/YW200 was used to detect  
 44 the upstream VIE, while YW847/YW1045 was used to detect the downstream VIE during *pta*  
 45 deletion. YW953/YW200 and YW847/YW954 were used to detect the upstream and  
 46 downstream VIE during *buk* deletion, respectively. VIE was confirmed by the appearance of  
 47 PCR band corresponding to the existence of the upstream (2,571 bp for *pta* deletion, 2,318 bp for  
 48 *buk* deletion) and downstream VIE (2,669 bp for *pta* deletion, and 2,490 bp for *buk* deletion).

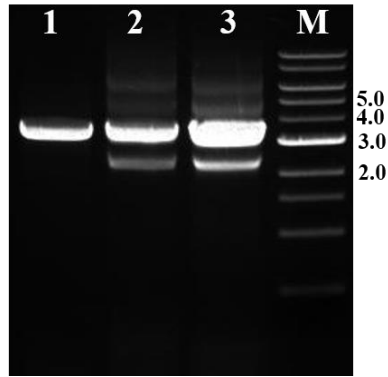

49  
50  
51  
52

53 **Figure S3.** Detection of *pta* deletion using PCR with the TGYLE liquid culture as template.

54 Lane 1, wild type; Lanes 2 and 3, cell transformants subcultured for two generations in the

55 TGYLE medium; Lane M, 1 kb DNA ladder from NEB with numbers on the right representing

56 the band size in kb. Besides the wild type band (3,280 bp), an additional shorter band (2,278 bp)

57 appeared in Lanes 2 and 3 indicating the appearance of the *pta* deletion mutant.

58

59

60

61

62

63

64

65

66

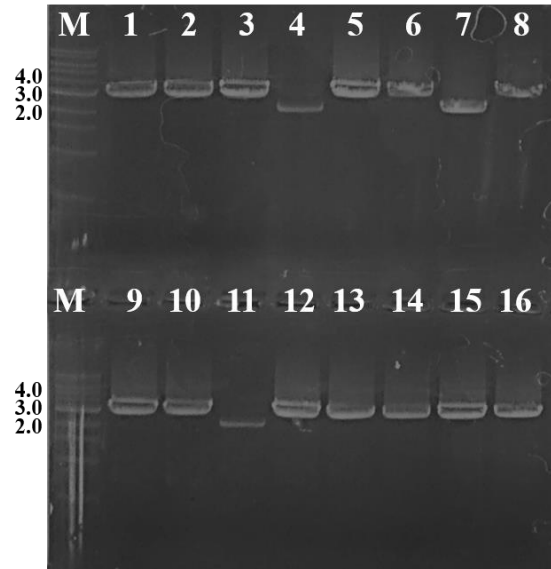

67

68 **Figure S4.** Detection of *pta* deletion in the colonies (replated from the fourth generation of  
 69 subculturing) using colony PCR (cPCR). Lane M, 1 kb DNA ladder from NEB with numbers on  
 70 the left representing the band size in kb. Out of the 16 colonies tested, three colonies generated  
 71 the pure mutant band (2,278 bp for *pta* deleted mutants vs. 3,280 bp for wild type) in Lanes 4, 7  
 72 and 11, respectively.

73

74

75

76

77

78

79

80

81

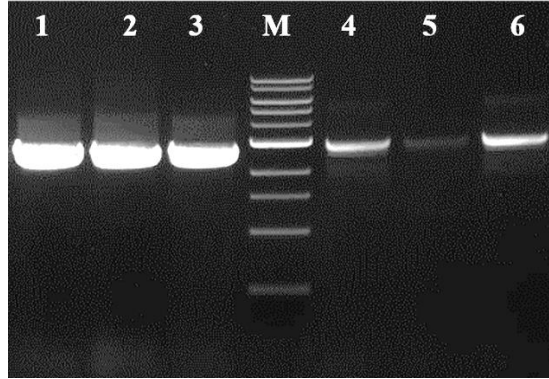

82

83 **Figure S5.** Vector integration event (VIE) detection in the *pta* deletion mutants. Lane 1-3, cPCR  
84 results using primers YW1044 and YW200 to detect VIE (2,571 bp) at the up end of the mutant  
85 site from the three mutant colonies, respectively, presented in Figure S3. Lane 4-5, cPCR results  
86 using primers YW847 and YW1045 to detect VIE (2,669 bp) at the down end of the mutant site  
87 from the three mutant colonies, respectively, presented in Figure S3. Lane M, Lane M, 1 kb  
88 DNA ladder from NEB with size from up to bottom: 10.0 kb, 8.0 kb, 6.0 kb, 5.0 kb, 4.0 kb, 3.0  
89 kb, 2.0 kb, 1.5 kb, 1.0 kb and 500 bp.

90

91

92

93

94

95

96

97

98

99

100

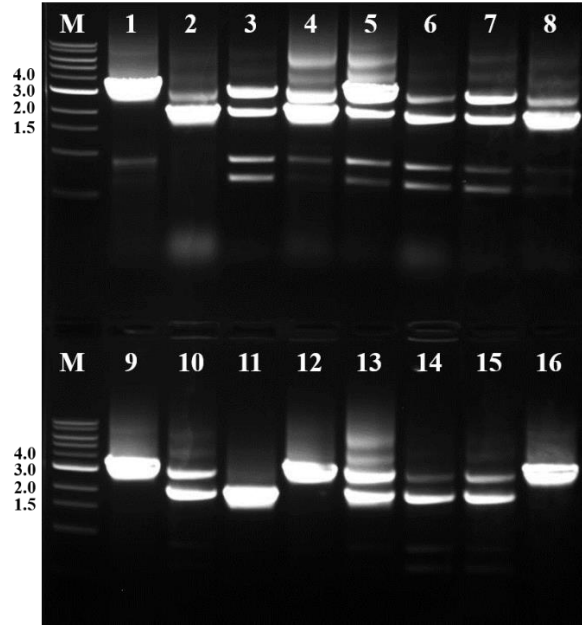

101

102

**Figure S6.** Detection of *buk* deletion in the colonies (replated from the seventh generation of subculturing) using colony PCR (cPCR). Lane M, 1 kb DNA ladder from NEB with numbers on the left representing the band size in kb. Out of sixteen colonies tested, one pure mutant was observed in Lane 11 with only the mutated band (2,061 bp). Double bands (2,061 bp for the mutant and 3,119 bp for the wild type) were detected in eleven colonies represented in Lanes 2-8, 10, 13-15.

108

109

110

111

112

113

114

115



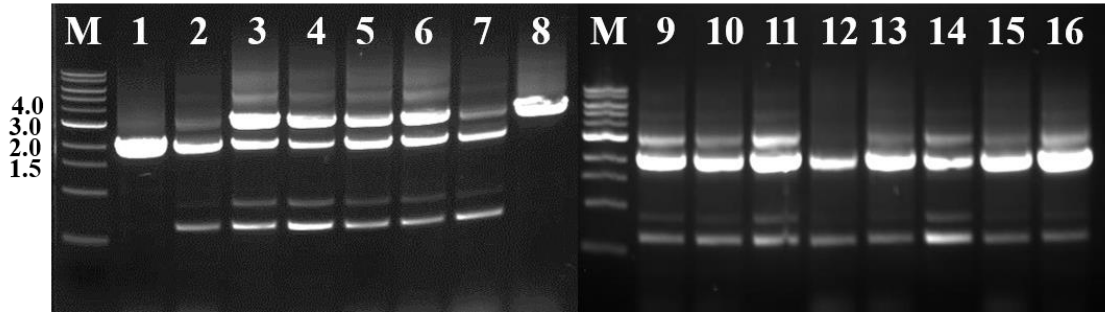

116

117 **Figure S7.** Detection of *buk* deletion in *C. saccharoperbutylacetonicum* deltpa using colony  
118 PCR (cPCR). Lane M, 1 kb DNA ladder from NEB with numbers on the left representing the  
119 band size in kb. Out of sixteen colonies tested, two pure mutants were observed in Lanes 1 and  
120 12 with only the mutant band (2,061 bp). Except one colony in Lane 8 showed only the wild type  
121 band (3,119 bp), the other 13 colonies all demonstrated double bands (2,061 bp for the mutant  
122 and 3,119 bp for the wild type).

123

124

125

126

127

128

129

130

131

132

133

134

135

136 **References**

- 137 1. **Wang Y, Zhang ZT, Seo SO, Lynn P, Lu T, Jin YS, Blaschek HP.** 2016. Bacterial  
138 genome editing with CRISPR-Cas9: deletion, integration, single nucleotide modification,  
139 and desirable “clean” mutant selection in *Clostridium beijerinckii* as an example. ACS  
140 Synth. Biol.

141
